# Supplementary material for: Nanoslit-concentration-chip integrated microbead-based protein assay system for sensitive and quantitative detection
Source: Royal Society of Chemistry journal article supplement (doi:10.1039/c7ra02460f), 2017-01-01
Supplement: c7ra02460f2.pdf [file c7ra02460f2.pdf]

## **Supporting Information**

### **Nanoslit-Concentration-Chip Integrated Microbead-based Protein Assay System for Sensitive and Quantitative Detection**

Yul Koh<sup>‡a</sup>, Jin-Kyoung Yang<sup>‡b</sup>, Min-Hye Oh<sup>a</sup>, Homan Kang<sup>c,d</sup>, Yoon-Sik Lee<sup>\*bc</sup>, and Yong-Kweon Kim<sup>\*a</sup>

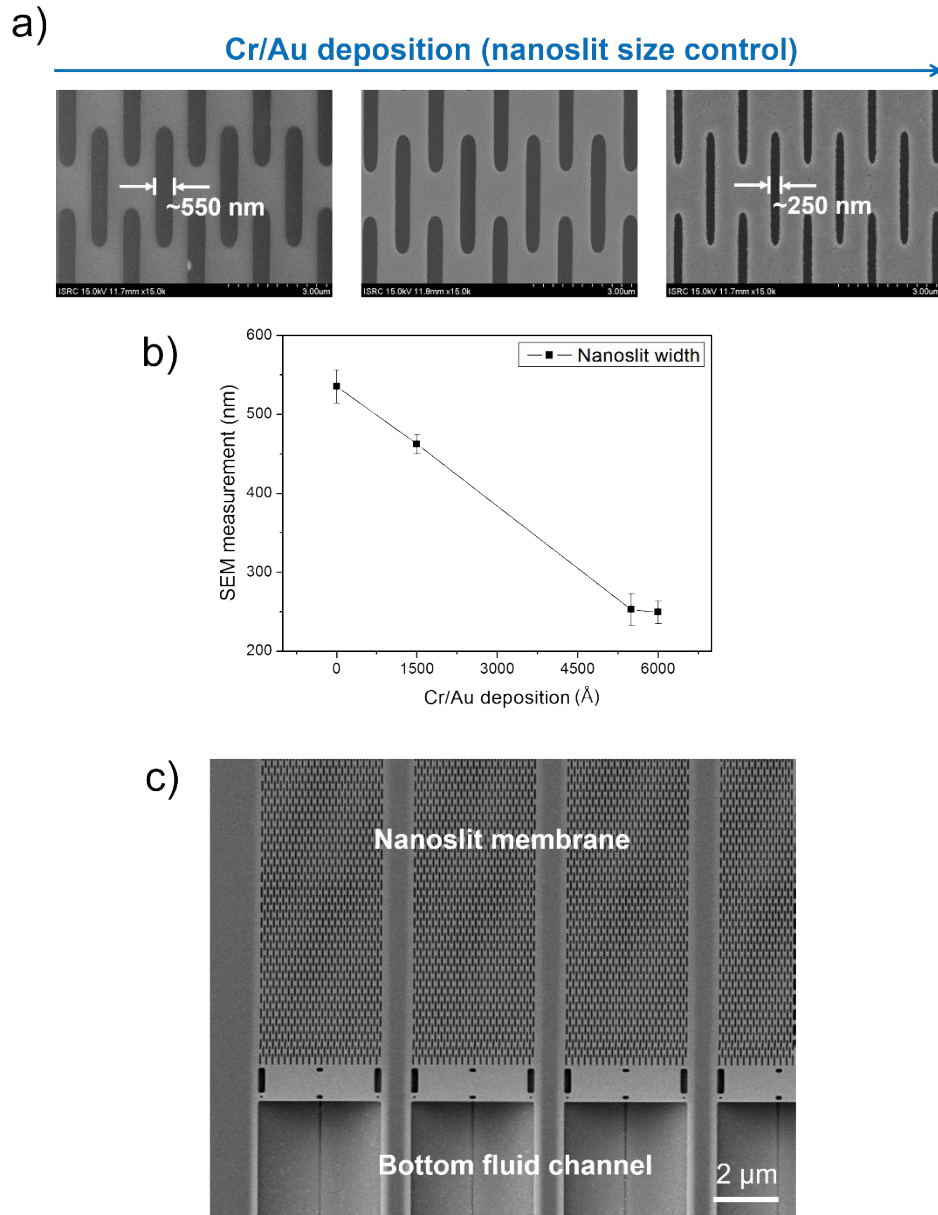

**Figure S1.** Fabrication results of the NC-Chip. a) SEM images during the Cr/Au sputtering process. b) The Nanoslit width profile during the Cr/Au sputtering process. c) SEM image of the nanoslit membrane and the bottom fluid channel.

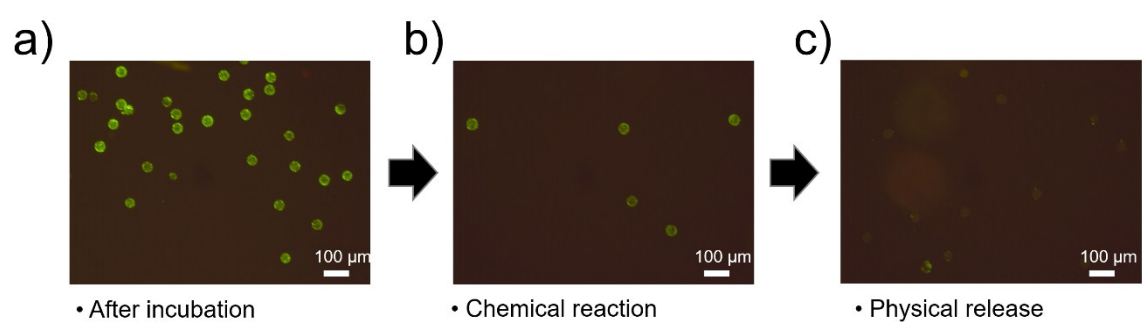

**Figure S2.** Off-chip test for Stav-FNPs releasing. Fluorescence images of microbeads after (a) incubation of  $10^4$  TG-Peptide with  $10^8$  Stav-FNPs, (b) formamide treatment for 1 h to induce denaturation of streptavidin and Stav-FNPs release, and (c) additional pressure-driven physical treatment.

- Off-chip Peptide-Streptavidin microbead assay  
:  $10^4/\text{ml}$  TG bead +  $1.25 \times 10^7 \sim 10^8/\text{ml}$  Streptavidin coated fluorescent NP, 1hour incubation

| Target NP concentration | 0                                                                                 | $1.25 \times 10^7$                                                                | $2.5 \times 10^7$                                                                 | $5 \times 10^7$                                                                    | $10^8$                                                                              |
|-------------------------|-----------------------------------------------------------------------------------|-----------------------------------------------------------------------------------|-----------------------------------------------------------------------------------|------------------------------------------------------------------------------------|-------------------------------------------------------------------------------------|
| Microbeads              | 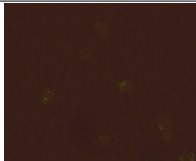 |  |  |  |  |

**Figure S3.** Off-chip microbead assay for Peptide-Streptavidin binding. Fluorescence images after incubation of  $10^4$  TG-Peptide with Stav-FNPs (concentrations  $1.25 \times 10^7$ ,  $2.5 \times 10^7$ ,  $5 \times 10^7$ ,  $10^8 \text{ mL}^{-1}$ ).
